# Supplementary material
Source: HighWire-hosted journal article supplement (http://www.cmaj.ca/highwire/filestream/58064/field_highwire_adjunct_files/1/flu-falagas-online_appendix_2.pdf)
Supplement: flu-falagas-online_appendix_2.pdf [file flu-falagas-online_appendix_2.pdf]

**Appendix 2:** Outcome data from the randomized controlled trials included in the meta-analysis of studies comparing fluoroquinolones and  $\beta$ -lactam antibiotics for the treatment of acute bacterial sinusitis (part 1 of 2)

| Study                             | Primary outcome                                                                                                           | Time of outcome evaluation after start of treatment, d | Clinical success at test-of-cure evaluation, n/N (%) <sup>*</sup>      |                                                                        | Bacteriologic success, n/N (%) <sup>†</sup> |                           | Adverse events <sup>‡</sup> , n/N (%)                                                  |                                       |                                                             | Relapse, <sup>‡</sup> n/N (%); time after end of treatment |
|-----------------------------------|---------------------------------------------------------------------------------------------------------------------------|--------------------------------------------------------|------------------------------------------------------------------------|------------------------------------------------------------------------|---------------------------------------------|---------------------------|----------------------------------------------------------------------------------------|---------------------------------------|-------------------------------------------------------------|------------------------------------------------------------|
|                                   |                                                                                                                           |                                                        | Fluoroquinolone                                                        | $\beta$ -Lactam                                                        | Fluoroquinolone                             | $\beta$ -Lactam           | Total                                                                                  | Withdrawn                             | Severe                                                      |                                                            |
| Arrieta et al <sup>21</sup>       | Total resolution of symptoms and improvement in imaging appearance of sinuses, without need for additional therapy        | 14-21                                                  | Clinically evaluable: 211/226 (93)<br>Intention-to-treat: 241/289 (83) | Clinically evaluable: 216/233 (93)<br>Intention-to-treat: 240/283 (85) | 109/113 (96) <sup>§</sup>                   | 117/121 (97) <sup>§</sup> | 93/289 (32) v. 84/283 (30)                                                             | 10/289 (3) v. 6/283 (2)               | 1/289 (< 1) v. 1/283 (< 1)                                  |                                                            |
| Henry et al <sup>22</sup>         | Resolution of at least one of acute signs and symptoms of sinusitis accompanied by absence of findings on imaging studies | 19-24                                                  | Clinically evaluable: 101/118 (86)                                     | Clinically evaluable: 102/123 (83)                                     |                                             |                           | Incidence of drug-related adverse events generally comparable between treatment groups | 2/133 (2) v. 3/138 (2)                | 0/118 (0) v. 0/123 (0)                                      |                                                            |
| Jareoncharsri et al <sup>23</sup> | Complete or incomplete resolution of symptoms and signs, supported by absence or improvement of radiologic findings       | 21                                                     | Clinically evaluable, intention-to-treat: 31/34 (91)                   | Clinically evaluable, intention-to-treat: 22/26 (85)                   | 22/28 (79)                                  | 14/20 (70)                | 3/34 (9) v. 2/26 (8)                                                                   | 0/34 (0) v. 0/26 (0)                  | 0/34 (0) v. 0/26 (0)                                        |                                                            |
| Sher et al <sup>24¶</sup>         | Resolution or improvement of all acute symptoms                                                                           | 17-24                                                  | Clinically evaluable: [102/137 (74) v.] 101/127 (80)                   | Clinically evaluable: 101/141 (72)                                     |                                             |                           | Incidence of drug-related adverse events was comparable between treatment groups       | [2/149 (1) v.] 5/141 (4) v. 3/155 (2) | [99% v.] 95% v. 97% of adverse events were mild or moderate | 6/445 (1), 21-28 d                                         |
| Rakkar et al <sup>25</sup>        | Disappearance or improvement of acute signs and symptoms                                                                  | 24-31                                                  | Clinically evaluable: 146/170 (86)<br>Intention to treat: 199/234 (85) | Clinically evaluable: 144/171 (84)<br>Intention-to-treat: 194/237 (82) |                                             |                           | 136/234 (58) v. 124/237 (52)                                                           | 12/234 (5) v. 8/237 (3)               | $\geq$ 87% of adverse events were mild or moderate          | 6/170 (4) v. 6/171 (4), 1-2 mo                             |

**Appendix 2: Outcome data from the randomized controlled trials included in the meta-analysis of studies comparing fluoroquinolones and  $\beta$ -lactam antibiotics for the treatment of acute bacterial sinusitis (part 2 of 2)**

| Study                         | Primary outcome                                                         | Time of outcome evaluation after start of treatment, d | Clinical success at test-of-cure evaluation, n/N (%) <sup>*</sup>      |                                                                        | Bacteriologic success, n/N (%) <sup>†</sup> |                 | Adverse events <sup>‡</sup> , n/N (%) |                             |                            | Relapse, <sup>§</sup> n/N (%); time after end of treatment |
|-------------------------------|-------------------------------------------------------------------------|--------------------------------------------------------|------------------------------------------------------------------------|------------------------------------------------------------------------|---------------------------------------------|-----------------|---------------------------------------|-----------------------------|----------------------------|------------------------------------------------------------|
|                               |                                                                         |                                                        | Fluoroquinolone                                                        | $\beta$ -Lactam                                                        | Fluoroquinolone                             | $\beta$ -Lactam | Total                                 | Withdrawn                   | Severe                     |                                                            |
| Siegert et al <sup>26</sup>   | Resolution of symptoms                                                  | 14                                                     | Clinically evaluable: 204/211 (97)<br>Intention to treat: 216/242 (89) | Clinically evaluable: 204/225 (91)<br>Intention-to-treat: 219/251 (87) | 103/109 (94)                                | 96/115 (83)     | 105/242 (43) v.<br>88/251 (35)        | 14/242 (6) v.<br>11/251 (4) | 3/242 (1) v.<br>8/251 (3)  | 12/204 (6) v.<br>13/204 (6),<br>27-31 d                    |
| Adelglass et al <sup>27</sup> | Complete or incomplete resolution of symptoms (proven radiographically) | 12-19                                                  | Clinically evaluable: 236/267 (88)                                     | Clinically evaluable: 234/268 (87)                                     |                                             |                 | 114/297 (38) v.<br>146/302 (48)       | 11/297 (4) v.<br>16/302 (5) | 7/297 (2) v.<br>15/302 (5) | 5/233 (2) v.<br>9/231 (4),<br>28-32 d                      |
| Burke et al <sup>28</sup>     | Complete or incomplete resolution of symptoms (proven radiographically) | 17-24                                                  | Clinically evaluable: 200/223 (90)<br>Intention to treat: 237/263 (90) | Clinically evaluable: 209/234 (89)<br>Intention-to-treat: 247/274 (90) |                                             |                 | 96/263 (37) v.<br>70/274 (26)         | 15/263 (6) v.<br>6/274 (2)  | 7/263 (3) v.<br>10/274 (4) | 3/184 (2) v.<br>5/202 (2),<br>27-31 d                      |
| Johnson et al <sup>29</sup>   | Resolution or improvement of symptoms (proven radiographically)         | 11-17                                                  | Clinically evaluable: 144/164 (88)                                     | Clinically evaluable: 133/158 (84)                                     | 89/92 (97)                                  | 78/82 (95)      | 115/250 (46) v.<br>113/251 (45)       | 1/250 (<1) v.<br>6/251 (2)  | 0/250 (0) v.<br>1/250 (<1) |                                                            |
| Weis et al <sup>30</sup>      | Complete resolution or significant improvement of symptoms              | 14-26                                                  | Clinically evaluable: 559/613 (91)                                     | Clinically evaluable: 546/606 (90)                                     |                                             |                 | 136/711 (19) v.<br>115/700 (16)       | 27/711 (4) v.<br>26/700 (4) |                            |                                                            |
| Gehanno et al <sup>31</sup>   | Resolution of all signs and symptoms                                    | 10-12                                                  | Clinically evaluable: 134/153 (88)                                     | Clinically evaluable: 130/149 (87)                                     | 102/109 (94)                                | 99/111 (89)     | 19/190 (10) v.<br>15/184 (8)          | 7/190 (4) v.<br>5/184 (3)   |                            |                                                            |

<sup>\*</sup>Clinically evaluable population consisted of the patients who fulfilled the criteria for evaluation; intention-to-treat population consisted of the patients randomly assigned to receive treatment.

<sup>†</sup>Bacteriologic success was defined as eradication or presumed eradication of the pathogens isolated before treatment.

<sup>‡</sup>Presented as fluoroquinolones v.  $\beta$ -lactams.

<sup>§</sup>Based on data for the bacteriologically valid per-protocol population.

<sup>¶</sup>Data in brackets refer to the 5-day gatifloxacin regimen, which were not taken into account in the meta-analysis.
